# Supplementary material for: External electric field treatment for improving the morphology and electrical performance of P(NDI2OD-T2)
Source: Royal Society of Chemistry journal article supplement (doi:10.1039/d3ta05681c), 2024-01-01
Supplement: d3ta05681c2.pdf [file d3ta05681c2.pdf]

## Supporting Information

### **External electric field treatment for improving morphology and electrical performance of P(NDI2OD-T2)**

*Yina Moon,<sup>a</sup> Yunseul Kim,<sup>a,b</sup> Dongseong Yang,<sup>a</sup> Nara Han,<sup>a</sup> Minwoo Lee,<sup>a</sup> Younghyo Kim,<sup>a</sup> Il-young Jo,<sup>a</sup> Myung-Han Yoon,<sup>a</sup> and Dong-Yu Kim<sup>a\*</sup>*

<sup>a</sup> School of Materials Science and Engineering (SMSE)  
Gwangju Institute of Science and Technology (GIST)  
123 Cheomdangwagi-ro Buk-gu, Gwangju 61005, Republic of Korea  
E-mail: kimdy@gist.ac.kr

<sup>b</sup> Department of Chemistry, Chemistry Research Laboratory  
University of Oxford  
Oxford, UK

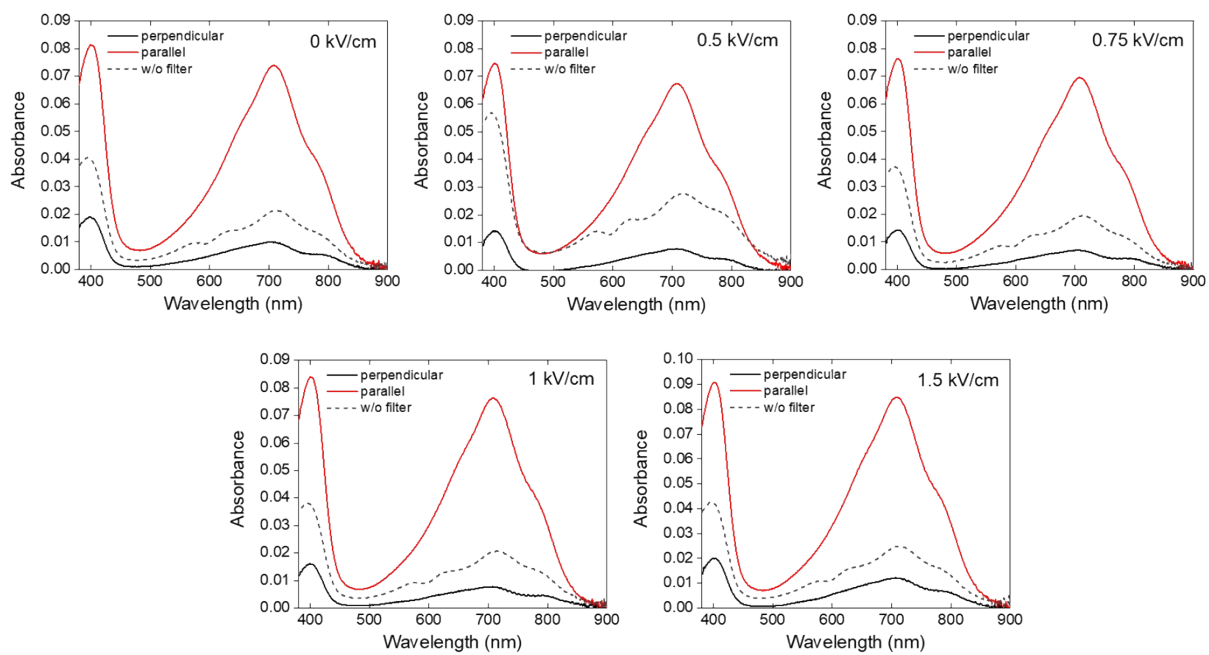

**Figure S1.** UV-vis absorption graphs with original light and parallel, perpendicular line-polarized lights according to external electric field (EEF) intensity

**Table S1.** Polarized UV-vis absorbance data: peak area values, order parameters extracted by the main absorption peak depending on the external electric field (EEF) intensities

| External electric field (kV/cm) | <b>0</b> | <b>0.5</b> | <b>0.75</b> | <b>1</b> | <b>1.5</b> |
|---------------------------------|----------|------------|-------------|----------|------------|
| Parallel ( $A_{//}$ )           | 12.72    | 11.63      | 11.90       | 13.05    | 14.52      |
| Peak area                       |          |            |             |          |            |
| Perpendicular ( $A_{\perp}$ )   | 1.87     | 1.29       | 1.31        | 1.53     | 2.21       |
| Calculated order parameter      | 0.66     | 0.73       | 0.73        | 0.71     | 0.65       |

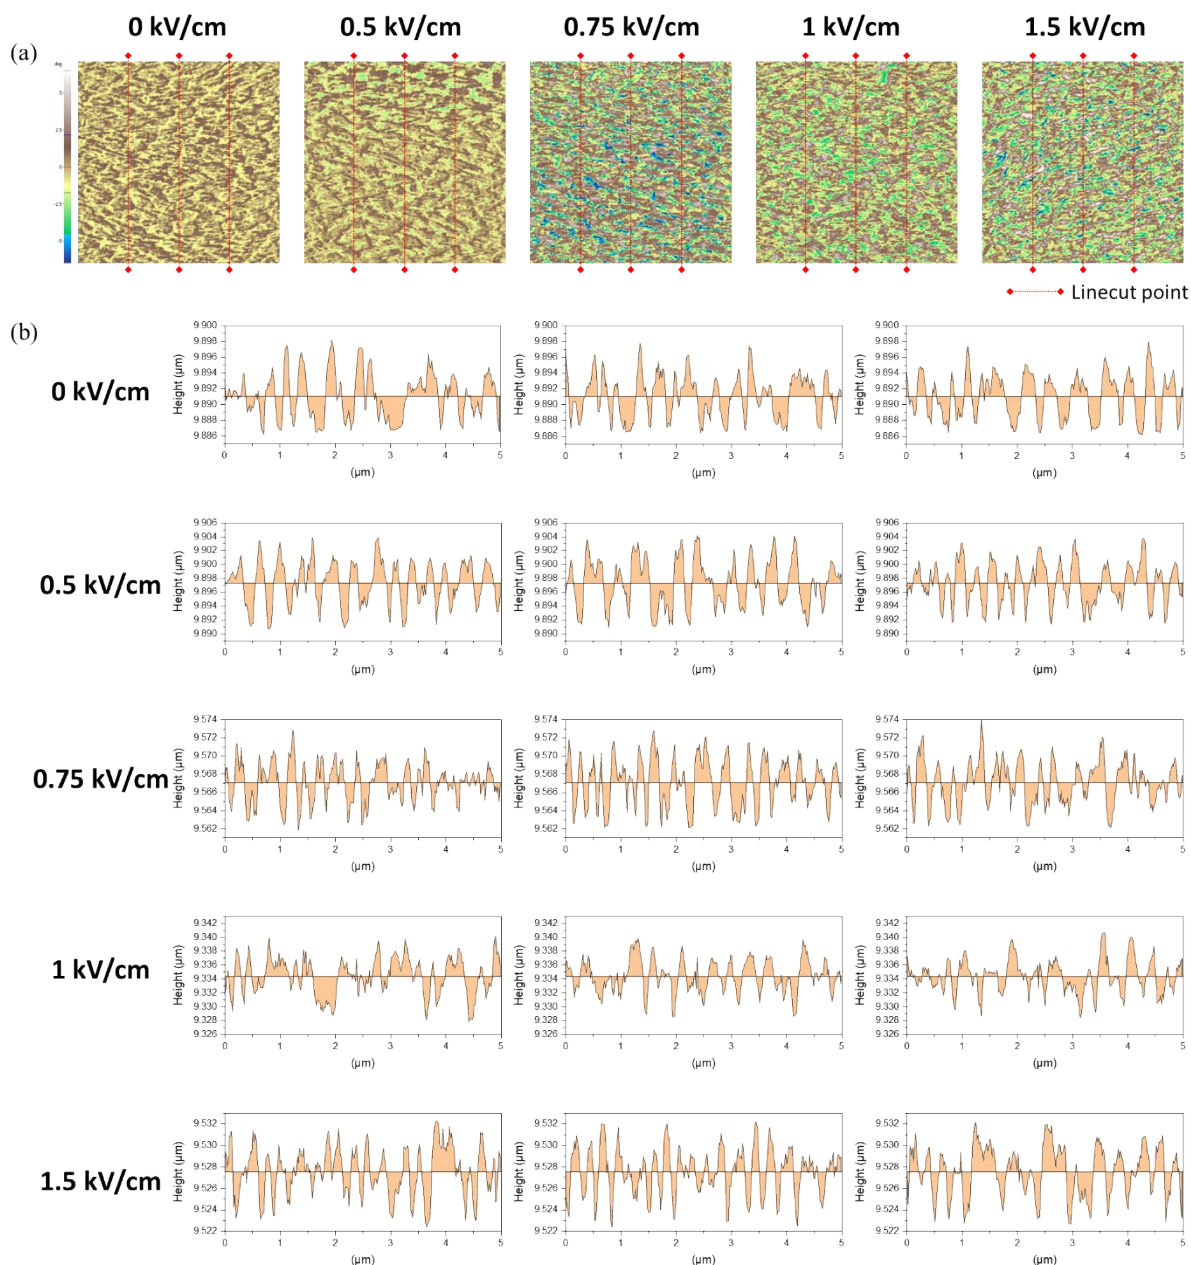

**Figure S2.** (a) AFM phase images, (b) vertical linecuts at 64, 128, 192 pixels in the x-axis

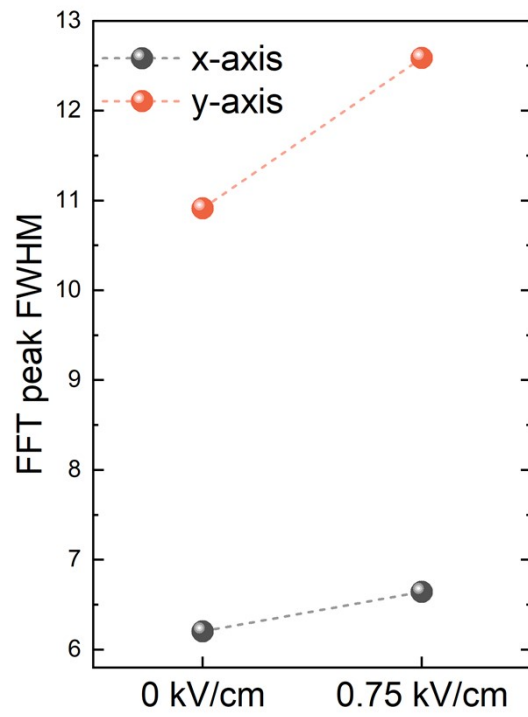

**Figure S3.** FWHM trend in the x- and y-axis direction of the FFT analysis peak

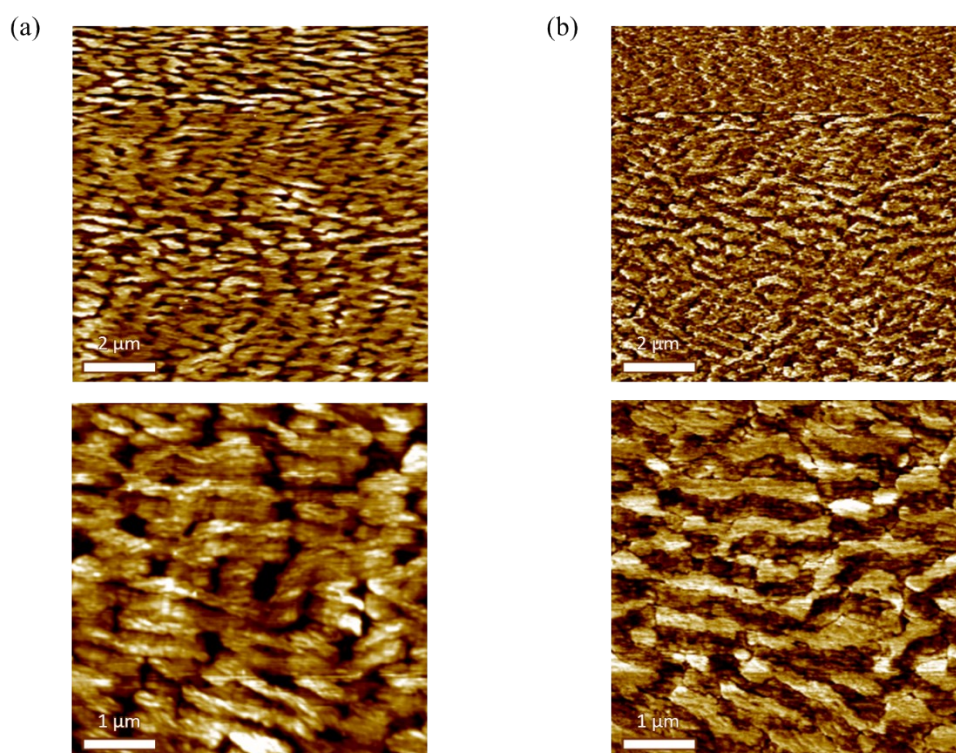

**Figure S4.** (a) AFM height images and (b) phase images with EEF treatment at the intensity of 2 kV/cm

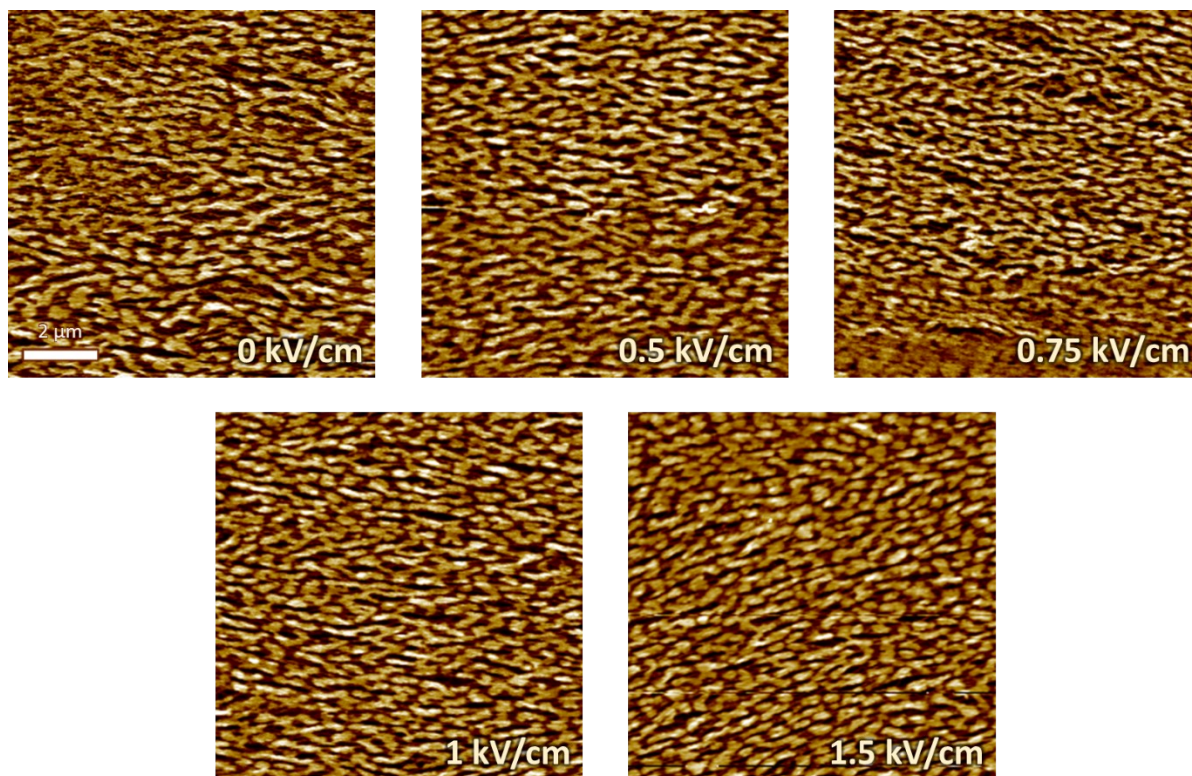

**Figure S5.** AFM height images in  $10 \times 10 \mu\text{m}$  area

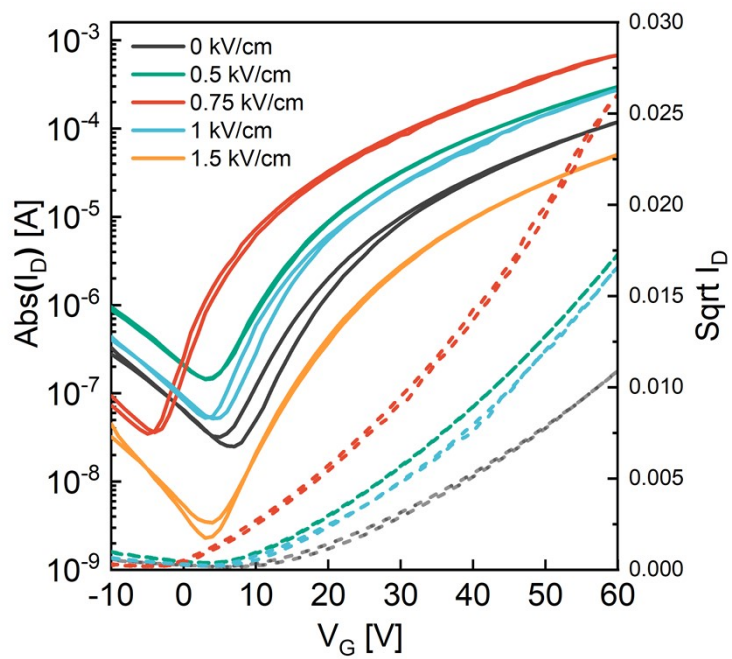

**Figure S6.** Transfer curves of OFETs according to EEF intensity



**Table S2.** Electrical performance depending on the EEF intensity extracted by operating OFETs

| External electric field (kV/cm)                                                                     |         | <b>0</b> | <b>0.5</b> | <b>0.75</b> | <b>1</b> | <b>1.5</b> |
|-----------------------------------------------------------------------------------------------------|---------|----------|------------|-------------|----------|------------|
| <b>Electron mobility [<math>\mu_e</math>]</b><br>( $\text{cm}^2/\text{Vs}$ )                        | Average | 1.69     | 1.68       | 2.14        | 1.58     | 1.20       |
|                                                                                                     | Maximum | 2.61     | 2.63       | 3.33        | 2.26     | 1.94       |
| <b>Threshold voltage [<math>V_{\text{Th}}</math>]</b><br>(V)                                        |         | 18.0     | 21.2       | 19.0        | 18.4     | 22.4       |
| <b>Contact resistance [<math>R_{\text{C}}</math>] at <math>V_{\text{Th}}</math></b><br>( $\Omega$ ) |         | 2.77E+07 | 2.33E+06   | 9.60E+05    | 6.67E+06 | 3.78E+07   |

**Table S3.** Summary of the reported electrical performance of OFETs based on P(NDI2OD-T2) up to the present date

| <b>Year</b> | <b>Max. electron mobility</b><br>[ $\mu_{e,max}$ ] (cm <sup>2</sup> /Vs) | <b>Threshold voltage</b><br>[ $V_{Th}$ ] (V) | <b><math>I_{on}/I_{off}</math></b> | <b>Literature</b> |
|-------------|--------------------------------------------------------------------------|----------------------------------------------|------------------------------------|-------------------|
| 2011        | 0.3                                                                      |                                              | 10 <sup>7</sup>                    | 63                |
| 2012        | 0.96                                                                     | ~30                                          | 10 <sup>7</sup>                    | 65                |
| 2014        | 0.14                                                                     | 15                                           | 10 <sup>4</sup>                    | 62                |
| 2014        | 0.23                                                                     |                                              | 10 <sup>3</sup>                    | 70                |
| 2015        | 1.28                                                                     | 3.95                                         | 10 <sup>4</sup>                    | 61                |
| 2016        | 1.22                                                                     | 41.66                                        | 10 <sup>5</sup>                    | 69                |
| 2017        | 0.061                                                                    | 50                                           | 10 <sup>6</sup>                    | 64                |
| 2018        | 1.47                                                                     | 5                                            | 10 <sup>5</sup>                    | 66                |
| 2019        | 3.99                                                                     | 15.22                                        | 10 <sup>4</sup>                    | 71                |
| 2020        | 2.78                                                                     | 23.16                                        | 10 <sup>4</sup>                    | 59                |
| 2021        | 0.069                                                                    | 55                                           | 10 <sup>3</sup>                    | 60                |
| 2021        | 2.56                                                                     |                                              |                                    | 68                |
| 2023        | 0.78                                                                     | 25                                           | 10 <sup>6</sup>                    | 67                |
| 2023        | 3.33                                                                     | 19                                           | 10 <sup>4</sup>                    | This work         |

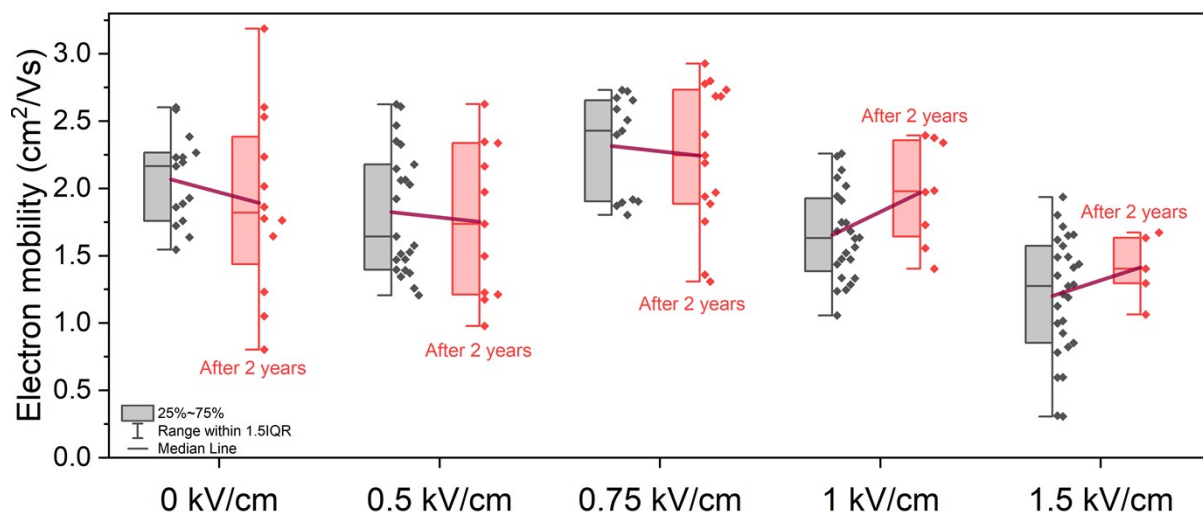

**Figure S7.** Electron mobility distribution of OFET measured before and after a 2-year period, comparing samples treated with 0 kV/cm and 0.75 kV/cm

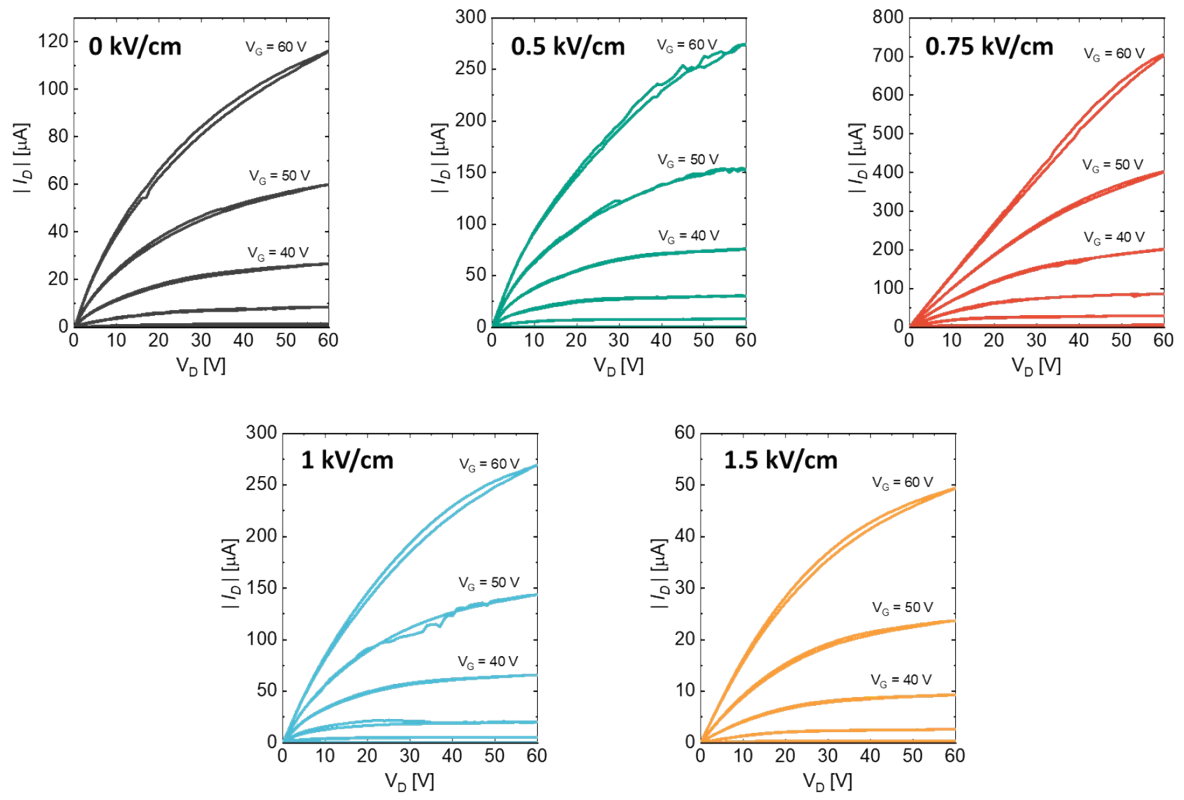

**Figure S8.** Output curve of OFETs according to EEF intensity

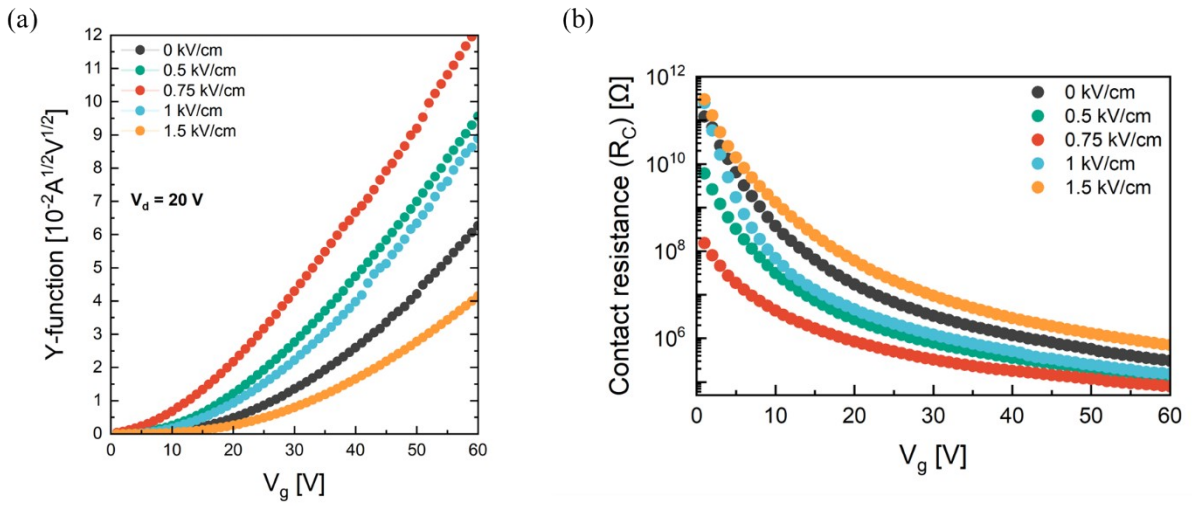

**Figure S9.** (a) Y-function and (b) contact resistance depending on the gate voltages with or without various EEF treatment
